# Supplementary material for: A closer look at underground natural gas pipeline leaks across the United States
Source: Oxford University Press journal article supplement (doi:10.1525/elementa.2021.00095), 2022-01-01
Supplement: elementa-data_accessibility.xlsx [file elementa-data_accessibility.xlsx]

## Sheet: Figure 1
Porosity (cm3/cm3)	Soil moisture content (g/g)	D10 (mm)	D60 (mm)	Permeability (m2)
0.26	0.097	0.074	0.178	5.58206e-12
0.5	0.15	0.09	3.1	8.25688e-12
0.41	0.086	0.074	0.15	5.58206e-12
0.5	0.072	0.076	1.9	5.88787e-12
0.46	0.202	0.11	4.75	1.23344e-11
0.49	0.092	0.072	0.17	5.2844e-12
0.51	0.039	NaN	0.43	NaN
0.46	0.167	0.11	4	1.23344e-11
0.460344	0.161763	0.16	NaN	2.60958e-11
0.44	0.036	0.17	4	2.94597e-11
0.527479	0.11151	0.052	0.27	2.75637e-12
0.549355	0.0192541	0.055	0.847	3.08359e-12
0.518924	0.0116552	0.052	0.25	2.75637e-12
0.341004	0.125127	0.148	2.2	2.23282e-11
0.409612	0.142437	0.147	1.19	2.20275e-11
0.489066	0.167295	0.08	1.6	6.52396e-12
0.365882	0.116597	0.092	1.6	8.62793e-12
0.408089	0.124165	0.08	1	6.52396e-12
0.39642	0.129996	0.12	1.7	1.46789e-11
0.511958	0.0943953	0.1	3.9	1.01937e-11
0.517107	0.169739	0.082	1.8	6.85423e-12
0.423245	0.0830961	0.11	3.2	1.23344e-11
0.358796	0.104364	0.14	1.8	1.99796e-11
0.333422	0.0918359	0.165	1.7	2.77523e-11
0.455123	0.146809	0.15	1.2	2.29358e-11
0.407668	0.090592	0.09	0.8	8.25688e-12
0.386177	0.0982109	0.1	3.5	1.01937e-11
0.512161	0.147615	0.15	3.45	2.29358e-11
0.414696	0.174253	0.1	2.8	1.01937e-11
0.418511	0.17915	0.11	3.1	1.23344e-11
0.413978	0.154308	0.148	3.2	2.23282e-11
0.305035	0.133474	0.1	2.9	1.01937e-11
0.461848	0.18189	0.17	3.2	2.94597e-11
0.382643	0.123239	0.19	NaN	3.67992e-11
0.367062	0.0885995	0.11	3.98	1.23344e-11
0.42849	0.181071	0.074	0.37	5.58206e-12
0.451617	0.0690994	0.105	0.425	1.12385e-11
0.455672	0.0717293	0.11	0.398	1.23344e-11
0.445428	0.0805857	0.99	0.46	9.99083e-10
0.455029	0.0782495	0.025	0.15	6.37105e-13
0.447381	0.103044	0.074	0.849	5.58206e-12
0.469851	0.0526534	0.055	0.21	3.08359e-12
0.396655	0.106509	0.1	1.3	1.01937e-11
0.477152	0.15766	0.3	NaN	9.17431e-11
0.415961	0.149736	0.2	NaN	4.07747e-11
0.448375	0.125984	0.179	3.05	3.26616e-11
0.554947	0.152202	0.095	0.41	9.1998e-12
0.379071	0.14174	0.073	0.38	5.43221e-12
0.485114	0.135583	0.075	0.34	5.73394e-12
0.47035	0.189483	0.28	2.8	7.99185e-11
0.380989	0.0564786	0.098	0.34	9.79001e-12
0.397976	0.0697909	0.1	0.28	1.01937e-11
0.286565	0.0200485	0.15	1.18	2.29358e-11
0.236004	0.00451218	0.21	2.6	4.49541e-11
0.228569	0.000447067	0.29	1.2	8.57288e-11
0.46	0.099	0.085	0.27	7.36493e-12
0.45	0.051	0.081	0.27	6.68807e-12
0.488022	0.151037	0.081	0.52	6.68807e-12
0.47	0.149	0.075	0.43	5.73394e-12
0.48	0.053	0.075	0.32	5.73394e-12
0.498625	0.180469	0.12	2.1	1.46789e-11
0.47	0.176301	0.11	1.7	1.23344e-11
0.49	0.161383	0.081	1.75	6.68807e-12
0.48	0.109	0.424	NaN	1.83258e-10
0.331476	0.0430472	0.3	4	9.17431e-11
0.477934	0.109206	0.25	3	6.37105e-11
0.515727	0.168503	0.2	3	4.07747e-11
0.519135	0.133295	0.18	2.8	3.30275e-11
0.55	0.132801	0.25	2.4	6.37105e-11
0.53	0.163	0.22	2.4	4.93374e-11
0.490124	0.130824	0.53	3.6	2.8634e-10
0.49	0.131	0.25	2.96	6.37105e-11
0.535	0.209044	0.09	0.7	8.25688e-12
0.456662	0.205184	0.181	3.99	3.33955e-11
0.429086	0.184237	0.2	NaN	4.07747e-11
0.417179	0.0934375	0.2	2.9	4.07747e-11
0.554556	0.209046	0.33	3.75	1.11009e-10
0.385089	0.0955093	0.28	NaN	7.99185e-11
0.482141	0.140865	0.28	2.9	7.99185e-11
0.462248	0.127001	0.5	NaN	2.54842e-10
0.482703	0.16543	0.17	1.5	2.94597e-11
0.278472	0.0617263	0.42	NaN	1.79817e-10
0.455586	0.148272	0.1	0.59	1.01937e-11
0.260038	0.122441	0.42	NaN	1.79817e-10
0.463056	0.168886	0.155	1.75	2.44903e-11
0.440064	0.186585	0.1	2.7	1.01937e-11
0.466877	0.186431	0.149	2.9	2.2631e-11
0.380785	0.0718455	0.3	4.2	9.17431e-11
0.502295	0.212346	0.11	1.25	1.23344e-11
0.503382	0.215696	0.151	2.9	2.32426e-11
0.308618	0.0746987	0.28	3.9	7.99185e-11
0.501309	0.133894	0.12	2.3	1.46789e-11
0.431816	0.0458888	0.199	3.5	4.0368e-11
0.538189	0.147259	0.176	3	3.15759e-11
0.46	0.323	0.195	NaN	3.87615e-11
0.41	0.237	0.185	1.2	3.48879e-11
0.35	0.168	0.13	1.1	1.72273e-11
0.44	0.181	0.39	NaN	1.55046e-10
0.41	0.187	0.2	NaN	4.07747e-11
0.41	0.186	0.21	NaN	4.49541e-11
0.432974	0.180429	0.23	2.4	5.39246e-11
0.435983	0.181392	0.215	2.1	4.71203e-11
0.438373	0.17054	0.245	2.8	6.11876e-11
0.41	0.066	0.195	0.32	3.87615e-11
0.43	0.204	0.17	2	2.94597e-11
0.55	0.212	0.11	1.85	1.23344e-11
0.35	0.173	0.3	3.5	9.17431e-11
0.43	0.172	0.255	3.05	6.62844e-11
0.456965	0.214391	0.265	3	7.15851e-11
0.397967	0.167435	0.28	NaN	7.99185e-11
0.579665	0.214008	0.423	3	1.82394e-10
0.351468	0.14964	0.148	3.2	2.23282e-11
0.342144	0.156716	0.182	NaN	3.37655e-11
0.366942	0.16565	0.14	2.7	1.99796e-11
0.363676	0.124695	0.183	3.7	3.41376e-11
0.394637	0.11477	0.298	NaN	9.0524e-11
0.406109	0.140462	0.205	2.25	4.28389e-11
0.406739	0.0751041	0.2	1.18	4.07747e-11
0.357129	0.0504956	0.32	NaN	1.04383e-10
0.368981	0.0771355	0.21	4.6	4.49541e-11
0.346139	0.147106	0.2	1.05	4.07747e-11
0.287395	0.135591	0.2	1.9	4.07747e-11
0.292627	0.155618	0.18	1	3.30275e-11
0.435325	0.183284	0.4	NaN	1.63099e-10
0.452525	0.187931	0.297	3.95	8.99174e-11
0.472104	0.211842	0.99	4.75	9.99083e-10
0.474976	0.141483	0.2	0.59	4.07747e-11
0.51406	0.154201	0.2	0.7	4.07747e-11
0.54912	0.187211	0.28	2.5	7.99185e-11
0.483364	0.153471	0.2	0.65	4.07747e-11
0.53783	0.256211	0.4	NaN	1.63099e-10
0.514578	0.179033	0.45	NaN	2.06422e-10
0.582162	0.408353	0.22	4	4.93374e-11
0.112528	0.175693	0.423	NaN	1.82394e-10
0.480437	0.323328	0.32	NaN	1.04383e-10
0.438808	0.262968	0.422	NaN	1.81533e-10
0.393944	0.110177	0.395	NaN	1.59047e-10
0.390363	0.133324	0.3	3.01	9.17431e-11
0.378144	0.175912	0.3	4.1	9.17431e-11
0.359904	0.16592	0.38	NaN	1.47197e-10
0.449466	0.195781	0.275	2.9	7.70897e-11
0.515107	0.25927	0.24	4.5	5.87156e-11
0.534579	0.198178	0.55	NaN	3.08359e-10
0.534849	0.201971	0.25	2.9	6.37105e-11
0.443443	0.150144	0.23	3.1	5.39246e-11
0.433398	0.155848	0.23	3.2	5.39246e-11
0.441526	0.156235	0.22	2.9	4.93374e-11
0.518511	0.263138	0.425	NaN	1.84123e-10
0.379878	0.144049	0.265	4.5	7.15851e-11
0.556896	0.262517	0.425	NaN	1.84123e-10
0.453926	0.265654	0.315	NaN	1.01147e-10
0.5058	0.258176	0.56	NaN	3.19674e-10
0.48293	0.223366	0.423	NaN	1.82394e-10
0.482803	0.261554	0.43	NaN	1.88481e-10
0.438846	0.232327	0.3	NaN	9.17431e-11
0.585697	0.487655	0.25	NaN	6.37105e-11
0.410309	0.102853	0.149	0.6	2.2631e-11
0.417869	0.11529	0.17	0.851	2.94597e-11
0.34354	0.137274	0.145	3.5	2.14322e-11
0.313521	0.0318863	0.51	NaN	2.65138e-10
0.305974	0.0353803	0.6	NaN	3.66972e-10
0.339938	0.0729463	0.275	2.9	7.70897e-11
0.413641	0.110823	0.151	0.72	2.32426e-11
0.527459	0.100124	0.17	1	2.94597e-11
0.396173	0.0949302	0.2	1.178	4.07747e-11
0.403126	0.185367	0.2	2.8	4.07747e-11
0.455509	0.190717	0.198	2.9	3.99633e-11
0.457723	0.21944	0.11	2.5	1.23344e-11
0.324073	0.125977	0.091	1.45	8.44139e-12
0.305229	0.107207	0.1	1.81	1.01937e-11
0.32876	0.104186	0.21	2.4	4.49541e-11
0.481084	0.272754	0.21	2.9	4.49541e-11
0.409106	0.448045	0.2	NaN	4.07747e-11
0.408493	0.231729	0.15	3.5	2.29358e-11
0.285682	0.0867653	0.3	3.2	9.17431e-11
0.281931	0.0965463	0.21	2	4.49541e-11
0.297464	0.440384	0.179	1.6	3.26616e-11
0.399877	0.179091	0.3	NaN	9.17431e-11
0.447	0.207102	0.1	NaN	1.01937e-11
0.432899	0.230164	0.075	4.5	5.73394e-12
0.368357	0.112773	0.115	NaN	1.34811e-11
0.372216	0.134327	0.25	4	6.37105e-11
0.304697	0.083935	0.25	3.9	6.37105e-11
0.43	0.213	0.1	0.425	1.01937e-11
0.355117	0.16764	0.18	1.085	3.30275e-11
0.414985	0.157681	0.2	1.9	4.07747e-11
0.489459	0.28494	0.25	4.74	6.37105e-11
0.38966	0.249925	0.23	1.9	5.39246e-11
0.443218	0.244292	0.26	3.6	6.89093e-11
0.453154	0.150275	0.4	NaN	1.63099e-10
0.450257	0.131091	0.29	NaN	8.57288e-11
0.503401	0.137455	0.22	2.5	4.93374e-11
0.456657	0.188222	0.425	NaN	1.84123e-10
0.429682	0.196927	0.299	NaN	9.11325e-11
0.431574	0.199913	1.4	NaN	1.99796e-09
0.517543	0.165025	0.17	3.9	2.94597e-11
0.572298	0.263786	0.15	2.8	2.29358e-11
0.510636	0.124745	0.11	4	1.23344e-11
0.481478	0.323837	0.25	3.1	6.37105e-11
0.577976	0.313825	0.85	3.9	7.36493e-10
0.520768	0.302492	0.4	4	1.63099e-10
0.52096	0.303969	1.18	NaN	1.41937e-09

## Sheet: Figure 2
Permeability (m2)	Maximum gas distance (m)	Soil gas diffusivity (Dp/Do)	Maximum gas distance (m)
6.32722e-12	4.44319	0.208725	4.44319
8.80938e-12	2.89159	0.24794	2.89159
2.263e-11	2.59528	0.219028	2.59528
2.86544e-12	2.18204	0.319734	2.18204
1.69599e-11	13.7168	0.177061	13.7168
9.94359e-12	14.174	0.175919	14.174
8.52396e-12	1.83514	0.252427	1.83514
2.00221e-11	3.66077	0.183957	3.66077
1.37954e-11	2.11721	0.200938	2.11721
1.51546e-11	4.26992	0.185757	4.26992
2.06606e-11	10.0596	0.156461	10.0596
1.82385e-11	1.83514	0.172763	1.83514
3.40885e-10	6.0979	0.248887	6.0979
3.10092e-12	3.23289	0.250429	3.23289
4.38433e-11	3.66077	0.197712	3.66077
1.12338e-11	4.57454	0.206904	4.57454
6.78865e-12	1.98705	0.217714	1.98705
3.33007e-11	6.85969	0.205384	6.85969
5.12063e-11	20.1174	0.159749	20.1174
7.0265e-12	3.23289	0.2508	3.23289
6.05199e-12	5.33618	0.238697	5.33618
8.25028e-11	0.6096	0.232481	0.6096
8.09021e-11	0.9144	0.159628	0.9144
1.15775e-10	0.6096	0.247912	0.6096
3.08005e-11	0.6096	0.189094	0.6096
4.16353e-11	0.6096	0.227402	0.6096
5.95668e-10	0	0.141415	0
7.57739e-10	0.6096	0.161227	0.6096
2.15766e-11	0.9144	0.230322	0.9144
9.93884e-11	0.6096	0.217358	0.6096
3.74878e-11	0.6096	0.192558	0.6096
7.52864e-12	0.681554	0.215013	0.681554
2.70846e-10	1.9812	0.1195	1.9812
9.71831e-12	2.76008	0.170917	2.76008
8.80938e-12	0	0.10824	0
1.94373e-11	0	0.15532	0
2.54409e-10	2.7432	0.228551	2.7432
2.91998e-12	0	0.167355	0
3.50068e-11	0	0.174014	0
3.26616e-11	0.4572	0.103692	0.4572
6.83452e-10	6.28361	0.145592	6.28361
1.23931e-11	3.9624	0.19976	3.9624
1.04655e-11	2.04466	0.149066	2.04466
9.59429e-12	6.91869	0.196742	6.91869
6.78865e-12	1.38004	0.157662	1.38004
2.23282e-11	2.7432	0.17677	2.7432
3.07095e-11	14.9352	0.149447	14.9352
6.53415e-11	0	0.220862	0
6.91369e-12	5.67166	0.188351	5.67166
8.7156e-12	3.5052	0.172828	3.5052
6.74268e-11	2.1336	0.153001	2.1336
6.54094e-11	0.0762	0.115678	0.0762
2.35559e-11	3.97411	0.129481	3.97411
4.86918e-11	9.144	0.179586	9.144
1.37954e-11	3.048	0.172589	3.048
1.49521e-11	2.76008	0.204625	2.76008
2.54842e-11	2.4384	0.107326	2.4384
1.19436e-10	4.06654	0.180228	4.06654
3.8315e-11	18.8939	0.226907	18.8939
1.23276e-10	5.10938	0.158583	5.10938
1.9105e-11	1.9812	0.136552	1.9812
4.72987e-11	1.8288	0.126819	1.8288
1.08198e-10	0.3048	0.157132	0.3048
9.34679e-11	4.8768	0.145952	4.8768
5.74929e-11	1.524	0.127081	1.524

## Sheet: Figure 3
Observed CH4 (ppmv)	Predicted CH4 (ppmv)
210000	287992
180000	334395
640000	457791
270000	374518
320000	307849
70000	267474
170000	479176
270000	557848
150000	470891
360000	407196
3700	116341
3600	170047
11500	298988
9000	170047
20000	102030
43000	186862
6000	235294
14000	133784
130000	362990
180000	454117
120000	369285
560000	454117
25000	94449.5
770000	191410
25000	39736.7
800000	645711
450000	660138
910000	677794
830000	700551
920000	732607
920000	787265
710000	984223
760000	787265
660000	732607
870000	700551
870000	677794
840000	660138
910000	645711
730000	633511
230000	622943
300000	613622
210000	605283
210000	597739
150000	841318
390000	219210
760000	362115
110000	249988
20500	196910
1100	165157
25000	159095
13000	163031
9500	153840
220000	165157
300	-6283.65
5000	80128.4
2300	80128.4
6000	191242
7000	222996
25500	276074
140000	388201
170000	388201
7000	276074
290000	328544
280000	356749
450000	400940
710000	477644
890000	620549
520000	411462
250000	351295
120000	330546
190000	82731.4
190000	129134
220000	214715
500000	216267
200000	134771
50000	106441
270000	316225
220000	288793
200000	161009
220000	169257
120000	102588
60000	66865.9
22500	42333.4
50000	410262
50000	323305
50000	207009
30000	165520
30000	141008
7000	267357
10000	215840
11000	32836
10000	81691.1
37000	227083
12500	227083
4500	87524.8
5000	81691.1
3000	32836
1100	2829.91
1000	775.289
1000	-24970
1000	-40848.9
40000	263346
11000	133651
1000	567.814
1000	-5086.9
10000	-6948.34
100000	350791
300000	452301
350000	452301
220000	388606
70000	350791
22500	324911
10000	263343
500000	321618
270000	288312
300	256371
170	203617
200	182059
190000	140986
270000	206466
460000	206466
260000	129893
680000	244282
750000	206466
450000	133577
260000	61565.8
250000	84124.6
750000	231092
400000	231092
200000	146397
150000	34133.9
890000	546522
910000	617043
1000000	665475
870000	566478
700000	523435
620000	518507
940000	665475
990000	610611
850000	572042
890000	551528
870000	520690
830000	523435
990000	531134
2000	-9326.45
530	1998.6
3000	15218.6
2200	29645.7
14000	31097.6
1550	37186.9
2600	43783.8
1200	67694.3
3300	102103
7000	36950.2
3000	30773.3
8500	87104.1
500000	122826
9000	189495
28500	336463
11000	173772
100000	189495
40000	173772
6000	115640
80000	82450.8
13000	59131.3
10500	41139.6
2450	26488.8
350000	62571.6
60000	43868.4
6500	28749.9
3200	16060.8
100000	5127.47
500	33794.3
570	102764
22000	194284
25000	257979
100000	194284
110000	158022
200000	173284
24	152148
40000	160587
300000	196850
280000	224282
40000	196850
690000	Inf
580000	224282
170000	169418
40000	137325
250000	165673
40000	220536
220000	Inf
50000	220536
50000	165673
100000	165673
230000	220536
220000	220536
90000	165673
70	Inf
94	168528
30	113665
135	168528
208	168528
22	113665
55	168528
45	113665
45000	78320.6
45000	133184
150000	Inf
250	133184
250	78320.6
40000	78320.6
50000	133184
45000	133184
45000	78320.6
250	72207.8
90000	127072
20000	Inf
4500	127072
2250	72207.8
30000	72207.8
20000	127072
40000	127072
40000	72207.8
240000	Inf
50000	137559
10000	82694.9
30000	137559
20000	82694.9
40000	137559
20000	82694.9
40000	137559
10000	82694.9
530000	NaN
60000	Inf
20000	222028
20000	167165
20000	135071
20000	158333
20000	194596
130000	NaN
100000	NaN
50000	NaN
50000	NaN
120000	NaN
120000	NaN
110000	NaN
120000	NaN
40000	50460.9
150000	105325
150000	Inf
40000	105325
80000	105325
50000	50460.9
20000	Inf
30000	-40355.9
250000	-72449.1
930000	Inf
450000	14507.9
10000	-40355.9
480000	NaN
4000	NaN
2000	NaN
1000	NaN
50000	NaN
35000	NaN
80000	NaN
150000	NaN
870000	NaN
1000	NaN
500	NaN
330000	NaN
50000	Inf
500	NaN
40000	NaN
250000	NaN
220000	NaN
50000	NaN
250000	NaN
50000	NaN
20000	NaN
3000	NaN
200000	NaN
500	NaN
500	NaN
70000	NaN
740000	NaN
110000	NaN
50000	NaN
10000	-10387.3
10000	77055.3
10000	49623.4
250000	77055.3
650000	Inf
500	62502.3
2500	109148
4000	62502.3
20000	-41654.2
10000	-17728.1
20000	32611.4
940000	Inf
30000	52503.4
10000	-7821.25
10000	-41654.2
30000	-7821.25
50000	9840.93
10000	-1749.92
200000	94802.5
300000	Inf
170000	94802.5
50000	88467
110000	NaN
370000	NaN
60000	NaN
10000	NaN
240000	NaN
600000	NaN
20000	NaN
16000	NaN
40000	NaN
5000	NaN
50000	NaN
20000	NaN
25000	NaN
13000	NaN
70000	NaN
150000	NaN
250000	NaN
970000	NaN
570000	NaN
400000	NaN
10000	NaN
230000	NaN
200000	NaN
610000	NaN
780000	NaN
660000	NaN
680000	NaN
30000	NaN
40000	NaN
20000	NaN
50000	NaN
20000	79313.8
60000	102084
50000	134177
140000	189041
150000	Inf
200000	53781.9
150000	37305.1
2100	4388.56
200000	69869.1
120000	40873.4
30000	13441.5
1000	-22821.5
120000	Inf
50000	40873.4
10000	-13990.4
20000	NaN
60000	NaN
40000	NaN
40000	NaN
40000	NaN
60000	NaN
110000	NaN
50000	NaN
40000	NaN
300000	NaN
180000	NaN
10000	NaN
30000	NaN
20000	NaN
10000	NaN
40000	NaN
50000	NaN
80000	NaN
30000	NaN
40000	NaN
180000	NaN
20000	NaN
200000	Inf
130000	183549
130000	128685
20000	90256
700000	NaN
300000	NaN
30000	NaN
10000	NaN
60000	NaN
50000	NaN
30000	NaN
980000	NaN
10000	NaN
30000	NaN
330000	NaN
200000	NaN
100000	-28670.1
100000	-17343.4
100000	-4120.84
100000	11762.6
780000	Inf
100000	130813
100000	75949
50000	43855.8
50000	21085.3
50000	3423.12
290000	-1605.41
200000	230073
500000	Inf
200000	247735
30000	-674.401
40000	-9766.34
80000	-7946.44
120000	104180
60000	13614.2
70000	127561
350000	262981
320000	237101
200000	254763
500000	180685
490000	176363
35000	161471
35000	182237
80000	222670
100000	Inf
50000	277534
40000	190577
30000	182237
100000	145036
200000	61360.6
200000	89592.1
200000	133887
90000	243614
200000	Inf
140000	133887
80000	89592.1
200000	103446
200000	103446
550000	Inf
330000	93293.2
270000	93293.2
30000	370553
600000	457510
330000	402646
710000	457510
960000	Inf
670000	457510
450000	402646
950000	457510
900000	402646
600000	370553
360000	347783
150000	330120
130000	238126
270000	Inf
80000	292990
110000	238126
30000	292990
620000	81027.4
780000	113121
95	167984
95	140553
82	104290
95	140553
80	104290
70000	Inf
120000	177481
10000	133675
70000	177481
120000	Inf
10000	57500.6
70000	232345
120000	232345
10000	89558.7
200000	109507
200000	138613
200000	158505
300000	225570
300000	211017
690000	211017
300000	312527
300000	225570
200000	122729
200000	158505
200000	185137
300000	312527
300000	248832
690000	248832
300000	225570
300000	185137
200000	115842
200000	147935
200000	170706
300000	257663
300000	230231
690000	230231
300000	257663
300000	202799
110000	151535
50000	13762.5
110000	4567.74
50000	115272
110000	66840.5
50000	87840.6
120000	449634
430000	522160
960000	577024
870000	467296
100000	423002
240000	394771
500000	357569
180000	NaN
210000	NaN
230000	NaN
90000	NaN
20000	-1233.11
400000	183416
400000	231848
800000	295543
400000	231848
100000	19373.2
100000	-1233.11
130000	NaN
270000	NaN
530000	NaN
660000	NaN
380000	NaN
180000	NaN
50000	NaN
130000	NaN
270000	NaN
530000	NaN
660000	NaN
380000	NaN
180000	NaN
50000	NaN
130000	NaN
270000	NaN
530000	NaN
660000	NaN
380000	NaN
180000	NaN
50000	NaN
110000	NaN
310000	NaN
610000	NaN
410000	NaN
80000	NaN
540000	NaN
660000	NaN
60000	NaN
30000	NaN
100000	NaN
30000	NaN
50000	NaN
10000	NaN
20000	NaN
70000	NaN
210000	NaN
100000	NaN
80000	NaN
130000	NaN
150000	NaN
170000	NaN
150000	NaN
780000	NaN
110000	NaN
100000	NaN
35000	NaN
50000	NaN
70000	NaN
70000	NaN
20000	NaN
10000	NaN
10000	NaN
20000	NaN
5000	NaN
340000	NaN
520000	NaN
360000	NaN
270000	NaN
400000	NaN
220000	NaN
180000	NaN
600000	NaN
540000	NaN
340000	NaN
520000	NaN
360000	NaN
270000	NaN
400000	NaN
220000	NaN
180000	NaN
600000	NaN
540000	NaN
340000	NaN
520000	NaN
360000	NaN
270000	NaN
400000	NaN
220000	NaN
180000	NaN
600000	NaN
540000	NaN
340000	NaN
520000	NaN
360000	NaN
270000	NaN
400000	NaN
220000	NaN
180000	NaN
600000	NaN
540000	NaN
310000	102672
630000	Inf
400000	75239.9
330000	38977
30000	75239.9
45000	38977

## Sheet: Figure S1
D30 (mm)	Dry bulk density (g/cm3)	Hydraulic conductivity (cm/s)	Gas diffusivity (Dp/Do)	Uniformity Coefficient	Coefficient of curvature
0.1	1.966	0.005476	0.10758	2.40541	0.759186
0.19	1.315	0.0081	0.231	34.4444	0.129391
0.09	1.576	0.005476	0.21384	2.02703	0.72973
0.15	1.334	0.005776	0.28248	25	0.155817
1.7	1.426	0.0121	0.17028	43.1818	5.5311
0.1	1.364	0.005184	0.26268	2.36111	0.816993
0.09	1.289	NaN	0.31086	NaN	NaN
1	1.43	0.0121	0.19338	36.3636	2.27273
1.1	1.43009	0.0256	0.197064	NaN	NaN
1.1	1.481	0.0289	0.26664	23.5294	1.77941
0.09	1.25218	0.002704	0.27454	5.19231	0.576923
0.11	1.19421	0.003025	0.349867	15.4	0.25974
0.098	1.27485	0.002704	0.334797	4.80769	0.738769
0.424	1.74634	0.021904	0.142478	14.8649	0.552138
0.32	1.56453	0.021609	0.176335	8.09524	0.585377
0.31	1.35398	0.0064	0.212369	20	0.750781
0.3	1.68041	0.008464	0.164528	17.3913	0.611413
0.3	1.56856	0.0064	0.18739	12.5	1.125
0.31	1.59949	0.0144	0.17584	14.1667	0.471078
0.51	1.29331	0.01	0.275592	39	0.666923
0.25	1.27967	0.006724	0.229263	21.9512	0.423442
0.851	1.5284	0.0121	0.224499	29.0909	2.05739
0.43	1.69919	0.0196	0.167925	12.8571	0.73373
0.51	1.76643	0.027225	0.159447	10.303	0.927273
0.28	1.44392	0.0225	0.203487	8	0.435556
0.2	1.56968	0.0081	0.20927	8.88889	0.555556
0.36	1.62663	0.01	0.190058	35	0.370286
1.16	1.29277	0.0225	0.240601	23	2.60019
0.68	1.55106	0.01	0.158692	28	1.65143
0.7	1.54095	0.0121	0.157978	28.1818	1.43695
0.61	1.55296	0.021904	0.171382	21.6216	0.785684
0.22	1.84166	0.01	0.11323	29	0.166897
0.85	1.4261	0.0289	0.184772	18.8235	1.32812
0.6	1.636	0.0361	0.171207	NaN	NaN
0.62	1.67729	0.0121	0.183785	36.1818	0.878026
0.85	1.5145	0.005476	0.163296	5	26.3879
0.22	1.45322	0.011025	0.252461	4.04762	1.08459
0.21	1.44247	0.0121	0.253403	3.61818	1.00731
0.22	1.46961	0.9801	0.240796	0.464646	0.10628
0.074	1.44417	0.000625	0.248675	6	1.46027
0.5	1.46444	0.005476	0.227263	11.473	3.97924
0.1	1.4049	0.003025	0.27535	3.81818	0.865801
0.3	1.59886	0.01	0.191497	13	0.692308
1.8	1.38555	0.09	0.210865	NaN	NaN
1.5	1.5477	0.04	0.175708	NaN	NaN
0.7	1.46181	0.032041	0.212778	17.0391	0.897518
0.17	1.17939	0.009025	0.265812	4.31579	0.741977
0.17	1.64546	0.005329	0.156639	5.20548	1.04182
0.17	1.36445	0.005625	0.23069	4.53333	1.13333
0.68	1.40357	0.0784	0.185372	10	0.589796
0.2	1.64038	0.009604	0.214177	3.46939	1.20048
0.19	1.59536	0.01	0.216602	2.8	1.28929
0.35	1.8906	0.0225	0.175901	7.86667	0.69209
0.51	2.02459	0.0441	0.152785	12.381	0.476374
0.65	2.04429	0.0841	0.150561	4.13793	1.21408
0.16	1.441	0.007225	0.23826	3.17647	1.11547
0.16	1.463	0.006561	0.26334	3.33333	1.17055
0.18	1.35674	0.006561	0.22241	6.41975	0.769231
0.151	1.41	0.005625	0.21186	5.73333	0.707008
0.151	1.366	0.005625	0.28182	4.26667	0.950042
0.25	1.32864	0.0144	0.209983	17.5	0.248016
0.3	1.3918	0.0121	0.193841	15.4545	0.481283
0.25	1.3498	0.006561	0.216887	21.6049	0.440917
1.98	1.383	0.179776	0.24486	NaN	NaN
1.3	1.77159	0.09	0.190363	13.3333	1.40833
1	1.38347	0.0625	0.243361	12	1.33333
0.84	1.28332	0.04	0.229168	15	1.176
0.425	1.27429	0.0324	0.254655	15.5556	0.358383
0.85	1.28566	0.0625	0.275351	9.6	1.20417
0.7	1.252	0.0484	0.24222	10.9091	0.92803
1.8	1.35117	0.2809	0.237138	6.79245	1.69811
0.87	1.355	0.0625	0.23694	11.84	1.02284
0.25	1.23225	0.0081	0.215131	7.77778	0.992063
0.83	1.43985	0.032761	0.165975	22.0442	0.953904
1.7	1.51292	0.04	0.161601	NaN	NaN
0.84	1.54448	0.04	0.213669	14.5	1.21655
1.18	1.18043	0.1089	0.228036	11.3636	1.12517
2.4	1.62951	0.0784	0.191123	NaN	NaN
0.85	1.37233	0.0784	0.225243	10.3571	0.889778
2.5	1.42504	0.25	0.221263	NaN	NaN
0.424	1.37084	0.0289	0.2094	8.82353	0.705004
2.38	1.91205	0.1764	0.143052	NaN	NaN
0.22	1.4427	0.01	0.202828	5.9	0.820339
3	1.9609	0.1764	0.0908138	NaN	NaN
0.33	1.4229	0.024025	0.194152	11.2903	0.401475
0.39	1.48383	0.01	0.167296	27	0.563333
0.43	1.41277	0.022201	0.185095	19.4631	0.42791
1.2	1.64092	0.09	0.2039	14	1.14286
0.29	1.31892	0.0121	0.191366	11.3636	0.611636
0.6	1.31604	0.022801	0.189873	19.2053	0.822106
0.83	1.83216	0.0784	0.154387	13.9286	0.630861
0.55	1.32153	0.0144	0.242494	19.1667	1.09601
0.87	1.50569	0.039601	0.254712	17.5879	1.08672
0.851	1.2238	0.030976	0.258013	17.0455	1.37159
0.64	1.42069	0.038025	0.09042	NaN	NaN
0.3	1.57277	0.034225	0.11418	6.48649	0.405405
0.2	1.72292	0.0169	0.12012	8.46154	0.27972
4.75	1.476	0.1521	0.17094	NaN	NaN
0.82	1.571	0.04	0.14718	NaN	NaN
1.2	1.576	0.0441	0.14784	NaN	NaN
0.49	1.50262	0.0529	0.166679	10.4348	0.434964
0.5	1.49464	0.046225	0.16803	9.76744	0.55371
0.851	1.48831	0.060025	0.17677	11.4286	1.05569
0.23	1.564	0.038025	0.22704	1.64103	0.847756
0.425	1.509	0.0289	0.14916	11.7647	0.53125
0.39	1.204	0.0121	0.22308	16.8182	0.74742
1.2	1.731	0.09	0.11682	11.6667	1.37143
0.86	1.509	0.065025	0.17028	11.9608	0.950948
0.86	1.43904	0.070225	0.160099	11.3208	0.930314
1.5	1.59539	0.0784	0.152151	NaN	NaN
1.5	1.11389	0.178929	0.241334	7.0922	1.77305
0.41	1.71861	0.021904	0.133207	21.6216	0.354941
1.21	1.74332	0.033124	0.122383	NaN	NaN
0.45	1.6776	0.0196	0.132853	19.2857	0.535714
0.72	1.68626	0.033489	0.157728	20.2186	0.765618
1.4	1.60421	0.088804	0.184712	NaN	NaN
0.43	1.57381	0.042025	0.175327	10.9756	0.400867
0.34	1.57214	0.04	0.218879	5.9	0.489831
NaN	1.70361	0.1024	0.202378	NaN	NaN
0.5	1.6722	0.0441	0.192618	21.9048	0.258799
0.32	1.73273	0.04	0.131362	5.25	0.487619
0.4	1.8884	0.04	0.100191	9.5	0.421053
0.28	1.87454	0.0324	0.0904262	5.55556	0.435556
1.7	1.49639	0.16	0.166347	NaN	NaN
1.18	1.45081	0.088209	0.174632	13.2997	1.18689
1.7	1.39892	0.9801	0.171773	4.79798	0.614567
0.3	1.39131	0.04	0.220106	2.95	0.762712
0.3	1.28774	0.04	0.237507	3.5	0.642857
0.6	1.19483	0.0784	0.23886	8.92857	0.514286
0.35	1.36908	0.04	0.21773	3.25	0.942308
1.8	1.22475	0.16	0.185869	NaN	NaN
2.5	1.28637	0.2025	0.22146	NaN	NaN
1.2	1.10727	0.0484	0.114714	18.1818	1.63636
1.6	2.3518	0.178929	0.103692	NaN	NaN
1.8	1.37684	0.1024	0.116054	NaN	NaN
2	1.48716	0.178084	0.187286	NaN	NaN
1.7	1.60605	0.156025	0.169646	NaN	NaN
0.73	1.61554	0.09	0.133474	10.0333	0.590144
1.2	1.64792	0.09	0.12803	13.6667	1.17073
1.95	1.69625	0.1444	0.167432	NaN	NaN
1	1.45892	0.075625	0.168853	10.5455	1.25392
1.17	1.28497	0.0576	0.222025	18.75	1.2675
2.3	1.23336	0.3025	0.219699	NaN	NaN
0.78	1.23265	0.0625	0.193577	11.6	0.839172
0.63	1.47488	0.0529	0.183183	13.4783	0.556662
0.6	1.50149	0.0529	0.188292	13.913	0.48913
0.7	1.47996	0.0484	0.168546	13.1818	0.768025
2	1.27595	0.180625	0.155647	NaN	NaN
1.5	1.64332	0.070225	0.19429	16.9811	1.88679
1.8	1.17423	0.180625	0.12426	NaN	NaN
1.7	1.44709	0.099225	0.163432	NaN	NaN
2.9	1.30963	0.3136	0.171312	NaN	NaN
2	1.37024	0.178929	0.146024	NaN	NaN
2.1	1.37057	0.1849	0.136303	NaN	NaN
1.75	1.48706	0.09	0.0647076	NaN	NaN
1.65	1.0979	0.0625	0.202921	NaN	NaN
0.28	1.56268	0.022201	0.199702	4.02685	0.876957
0.31	1.54265	0.0289	0.136135	5.00588	0.66427
0.4	1.73962	0.021025	0.185879	24.1379	0.315271
1.9	1.81917	0.2601	0.178592	NaN	NaN
2.5	1.83917	0.36	0.176214	NaN	NaN
0.57	1.74916	0.075625	0.19986	10.5455	0.407398
0.3	1.55385	0.022801	0.282041	4.76821	0.827815
0.355	1.25223	0.0289	0.19882	5.88235	0.741324
0.4	1.60014	0.04	0.143721	5.89	0.679117
0.425	1.58172	0.04	0.174763	14	0.322545
0.5	1.4429	0.039204	0.157267	14.6465	0.435388
0.49	1.43703	0.0121	0.130744	22.7273	0.873091
0.3	1.79121	0.008281	0.130694	15.9341	0.682077
0.28	1.84114	0.01	0.148219	18.1	0.433149
0.42	1.77879	0.0441	0.137498	11.4286	0.35
0.59	1.37513	0.0441	0.116664	13.8095	0.571593
1	1.56587	0.04	0.131285	NaN	NaN
0.6	1.56749	0.0225	0.122354	23.3333	0.685714
0.79	1.89294	0.09	0.145719	10.6667	0.650104
0.59	1.90288	0.0441	0.158333	9.52381	0.82881
0.4	1.86172	0.032041	0.133805	8.93855	0.558659
1.5	1.59033	0.09	0.168685	NaN	NaN
1.6	1.46545	0.01	0.157007	NaN	NaN
1.15	1.50282	0.005625	0.145703	60	3.91852
1.05	1.67385	0.013225	0.14322	NaN	NaN
0.71	1.66363	0.0625	0.123734	16	0.5041
0.7	1.84255	0.0625	0.169821	15.6	0.502564
0.23	1.5	0.01	0.134982	4.25	1.24471
3.85	1.70894	0.0324	0.0922252	6.02778	75.8961
0.32	1.55029	0.04	0.131291	9.5	0.269474
0.43	1.35293	0.0625	0.1999	18.96	0.156034
1.2	1.6174	0.0529	0.210649	8.26087	3.29519
1	1.47547	0.0676	0.241524	13.8462	1.06838
1.5	1.44914	0.16	0.177167	NaN	NaN
1.4	1.45682	0.0841	0.153618	NaN	NaN
0.6	1.31599	0.0484	0.152896	11.3636	0.654545
1.5	1.43986	0.180625	0.232662	NaN	NaN
1.6	1.51134	0.089401	0.203617	NaN	NaN
3	1.50633	1.96	0.254688	NaN	NaN
1	1.27851	0.0289	0.104043	22.9412	1.5083
0.6	1.13341	0.0225	0.17434	18.6667	0.857143
0.7	1.29681	0.0121	0.144063	36.3636	1.11364
1.3	1.37408	0.0625	0.143214	12.4	2.18065
1.3	1.11836	0.7225		4.58824	0.509804
1.5	1.26996	0.16		10	1.40625
3.5	1.26946	1.3924		NaN	NaN

## Sheet: Figure S2
Distance (m)	CH4 (ppmv)	Soil moisture content (g/g)
4.11762	210000	0.117679
2.29107	180000	0.117679
0.481931	640000	0.117679
1.38004	270000	0.117679
3.20403	320000	0.117679
5.33618	70000	0.117679
1.30211	170000	0.075
0.481931	270000	0.075
1.44579	150000	0.075
3.23289	360000	0.075
1.5316	3700	0.13097
0.777091	3600	0.13097
0.1524	11500	0.13097
0.777091	9000	0.13097
1.83514	20000	0.13097
0.628361	43000	0.13097
0.340777	6000	0.13097
1.22869	14000	0.13097
1.98705	130000	0.143175
0.628361	180000	0.143175
1.83514	120000	0.143175
0.628361	560000	0.143175
2.13904	25000	0.167006
0.628361	770000	0.167006
4.26992	25000	0.167006
10.9739	800000	0.00833592
9.14527	450000	0.00833592
7.31679	910000	0.00833592
5.48852	830000	0.00833592
3.66077	920000	0.00833592
1.83514	920000	0.00833592
0.1524	710000	0.00833592
1.83514	760000	0.00833592
3.66077	660000	0.00833592
5.48852	870000	0.00833592
7.31679	870000	0.00833592
9.14527	840000	0.00833592
10.9739	910000	0.00833592
12.8025	730000	0.00833592
14.6312	230000	0.00833592
16.4599	300000	0.00833592
18.2886	210000	0.00833592
20.1174	210000	0.00833592
0.927013	150000	0.00833592
0.927013	390000	0.111871
0.1524	760000	0.111871
0.628361	110000	0.111871
1.22869	20500	0.111871
1.83514	1100	0.111871
1.9812	25000	0.111871
1.88508	13000	0.111871
2.11721	9500	0.111871
1.83514	220000	0.111871
3.66077	300	0.134972
1.22869	5000	0.134972
1.22869	2300	0.134972
1.83514	6000	0.132067
1.22869	7000	0.132067
0.628361	25500	0.132067
0.1524	140000	0.132067
0.1524	170000	0.132067
0.628361	7000	0.132067
6.0979	290000	0.0738048
4.26992	280000	0.0738048
2.44316	450000	0.0738048
0.927013	710000	0.0738048
0.1524	890000	0.0738048
2.13904	520000	0.0738048
4.57454	250000	0.0738048
5.94555	120000	0.0738048
4.11762	190000	0.105251
2.29107	190000	0.105251
0.777091	220000	0.105251
0.762	500000	0.105251
2.1336	200000	0.105251
3.05181	50000	0.105251
0.215526	270000	0.105251
0.3048	220000	0.105251
1.5316	200000	0.105251
1.38004	220000	0.105251
3.20403	120000	0.105251
5.03151	60000	0.105251
6.85969	22500	0.105251
0.1524	50000	0.172718
0.4572	50000	0.172718
1.98705	50000	0.172718
3.35626	30000	0.172718
4.57454	30000	0.172718
0.927013	7000	0.172718
1.77727	10000	0.172718
3.96533	11000	0.156557
2.13904	10000	0.156557
0.340777	37000	0.156557
0.340777	12500	0.156557
1.98705	4500	0.156557
2.13904	5000	0.156557
3.96533	3000	0.156557
5.7932	1100	0.156557
5.94555	1000	0.156557
8.23101	1000	0.156557
10.0596	1000	0.156557
0.215526	40000	0.156557
1.10949	11000	0.156557
5.96116	1000	0.156557
6.40261	1000	0.156557
6.55497	10000	0.156557
2.33127	100000	0.0779823
0.646578	300000	0.0779823
0.646578	350000	0.0779823
1.44579	220000	0.0779823
2.33127	70000	0.0779823
3.23289	22500	0.0779823
1.5911	10000	0.10125
0.762	500000	0.10125
1.16064	270000	0.10125
1.73763	300	0.10125
3.38383	170	0.10125
4.44319	200	0.10125
2.51345	190000	0.111
1.09897	270000	0.111
1.09897	460000	0.111
2.89159	260000	0.111
0.681554	680000	0.111
1.09897	750000	0.111
2.76008	450000	0.111
1.83514	260000	0.121588
1.38004	250000	0.121588
0.215526	750000	0.121588
0.215526	400000	0.121588
0.628361	200000	0.121588
2.59528	150000	0.121588
1.5316	890000	0.047473
0.628361	910000	0.047473
0.340777	1000000	0.047473
1.19028	870000	0.047473
2.05033	700000	0.047473
2.18204	620000	0.047473
0.340777	940000	0.047473
0.681554	990000	0.047473
1.10949	850000	0.047473
1.43774	890000	0.047473
2.12269	870000	0.047473
2.05033	830000	0.047473
1.86028	990000	0.047473
13.7168	2000	0.144953
11.8882	530	0.144953
10.0596	3000	0.144953
8.38339	2200	0.144953
8.23101	14000	0.144953
7.62152	1550	0.144953
7.01206	2600	0.144953
5.18384	1200	0.144953
3.35626	3300	0.144953
7.64435	7000	0.144953
8.2648	3000	0.144953
5.03151	8500	0.123586
3.20403	500000	0.123586
1.38004	9000	0.123586
0.215526	28500	0.123586
1.68331	11000	0.123586
1.38004	100000	0.123586
1.68331	40000	0.123586
3.50851	6000	0.123586
5.33618	80000	0.123586
7.16442	13000	0.123586
8.99289	10500	0.123586
10.8215	2450	0.123586
6.85969	350000	0.123586
8.68814	60000	0.123586
10.5167	6500	0.123586
12.3453	3200	0.123586
14.174	100000	0.123586
3.66077	500	0.0930986
1.5316	570	0.0930986
0.481931	22000	0.0930986
0.215526	25000	0.0930986
0.481931	100000	0.0930986
0.762	110000	0.0930986
0.628361	200000	0.0930986
0.820699	24	0.0930986
0.681554	40000	0.137582
0.431052	300000	0.137582
0.3048	280000	0.137582
0.431052	40000	0.137582
0	690000	0.137582
0.3048	580000	0.137582
0.6096	170000	0.137582
0.9144	40000	0.137582
0.6096	250000	0.17158
0.3048	40000	0.17158
0	220000	0.17158
0.3048	50000	0.17158
0.6096	50000	0.17158
0.6096	100000	0.17158
0.3048	230000	0.17158
0.3048	220000	0.17158
0.6096	90000	0.17158
0	70	0.100435
0.3048	94	0.100435
0.6096	30	0.100435
0.3048	135	0.100435
0.3048	208	0.100435
0.6096	22	0.100435
0.3048	55	0.100435
0.6096	45	0.100435
0.6096	45000	0.139406
0.3048	45000	0.139406
0	150000	0.139406
0.3048	250	0.139406
0.6096	250	0.139406
0.6096	40000	0.139406
0.3048	50000	0.139406
0.3048	45000	0.139406
0.6096	45000	0.139406
0.6096	250	0.11261
0.3048	90000	0.11261
0	20000	0.11261
0.3048	4500	0.11261
0.6096	2250	0.11261
0.6096	30000	0.11261
0.3048	20000	0.11261
0.3048	40000	0.11261
0.6096	40000	0.11261
0	240000	0.172976
0.3048	50000	0.172976
0.6096	10000	0.172976
0.3048	30000	0.172976
0.6096	20000	0.172976
0.3048	40000	0.172976
0.6096	20000	0.172976
0.3048	40000	0.172976
0.6096	10000	0.172976
0	530000	0.311031
0	60000	0.184519
0.3048	20000	0.184519
0.6096	20000	0.184519
0.9144	20000	0.184519
0.681554	20000	0.184519
0.431052	20000	0.184519
0	130000	0.195021
0.3048	100000	0.195021
0.6096	50000	0.195021
0.3048	50000	0.195021
0.3048	120000	0.195021
0.6096	120000	0.195021
0.3048	110000	0.195021
0.6096	120000	0.195021
0.6096	40000	0.139607
0.3048	150000	0.139607
0	150000	0.139607
0.3048	40000	0.139607
0.3048	80000	0.139607
0.6096	50000	0.139607
0	20000	0.180911
1.8288	30000	0.17054
2.7432	250000	0.17054
0	930000	0.17054
0.9144	450000	0.17054
1.8288	10000	0.17054
0	480000	0.184667
0	4000	0.184667
0	2000	0.184667
0	1000	0.184667
0	50000	0.242667
0	35000	0.242667
0	80000	0.242667
0	150000	0.242667
0	870000	0.242667
0	1000	0.242667
0	500	0.242667
0.0762	330000	0.327179
0	50000	0.281199
1.8288	500	0.159092
0.9144	40000	0.159092
0	250000	0.159092
0.9144	220000	0.159092
1.8288	50000	0.159092
2.04466	250000	0.159092
2.58631	50000	0.159092
2.04466	20000	0.159092
2.58631	3000	0.159092
2.7432	200000	0.159092
1.6414	500	0.249066
1.5316	500	0.249066
2.05033	70000	0.249066
0.549486	740000	0.249066
1.55418	110000	0.249066
2.1336	50000	0.249066
1.38004	10000	0.168823
0.4572	10000	0.168823
0.646578	10000	0.168823
0.4572	250000	0.168823
0	650000	0.168823
0.549486	500	0.168823
0.3048	2500	0.168823
0.549486	4000	0.168823
3.5052	20000	0.223235
2.5908	10000	0.223235
1.3716	20000	0.223235
0	940000	0.223235
1.0668	30000	0.223235
2.286	10000	0.223235
3.5052	10000	0.223235
2.286	30000	0.223235
1.8288	50000	0.223235
2.11721	10000	0.223235
1.8288	200000	0.259719
0	300000	0.259719
1.8288	170000	0.259719
1.9812	50000	0.259719
0.9144	110000	0.199221
0	370000	0.199221
1.2192	60000	0.199221
2.4384	10000	0.199221
3.3528	240000	0.199221
4.2672	600000	0.199221
13.1064	20000	0.199221
14.0208	16000	0.199221
14.9352	40000	0.199221
3.13811	5000	0.199221
11.9845	50000	0.199221
12.892	20000	0.199221
13.8004	25000	0.199221
0.4572	13000	0.249511
2.5908	70000	0.154076
1.6764	150000	0.154076
0.762	250000	0.154076
0.1524	970000	0.154076
1.0668	570000	0.154076
1.9812	400000	0.154076
3.81	10000	0.154076
2.66155	230000	0.154076
1.7838	200000	0.154076
0.975836	610000	0.154076
0.628361	780000	0.154076
1.22869	660000	0.154076
2.07286	680000	0.154076
2.95907	30000	0.154076
3.85846	40000	0.154076
4.76357	20000	0.154076
5.67166	50000	0.154076
2.4384	20000	0.17944
1.8288	60000	0.17944
1.2192	50000	0.17944
0.6096	140000	0.17944
0	150000	0.17944
3.36663	200000	0.17944
4.14573	150000	0.17944
6.28361	2100	0.17944
2.74743	200000	0.17944
0.9144	120000	0.186464
1.29316	30000	0.186464
2.04466	1000	0.186464
0	120000	0.186464
0.9144	50000	0.186464
1.8288	10000	0.186464
5.9436	20000	0.190721
5.0292	60000	0.190721
4.1148	40000	0.190721
2.286	40000	0.190721
1.3716	40000	0.190721
0.4572	60000	0.190721
0.4572	110000	0.190721
1.3716	50000	0.190721
2.286	40000	0.190721
3.2004	300000	0.190721
4.1148	180000	0.190721
6.91869	10000	0.190721
5.11165	30000	0.190721
4.21518	20000	0.190721
2.4621	10000	0.190721
1.64846	40000	0.190721
1.02233	50000	0.190721
1.02233	80000	0.190721
1.64846	30000	0.190721
2.4621	40000	0.190721
3.32847	180000	0.190721
4.21518	20000	0.190721
0	200000	0.160667
1.2192	130000	0.160667
2.4384	130000	0.160667
3.9624	20000	0.160667
0.3048	700000	0.194352
0.963862	300000	0.194352
1.85403	30000	0.194352
2.76008	10000	0.194352
0	60000	0.200075
0	50000	0.200075
0	30000	0.200075
0	980000	0.200075
0	10000	0.200075
0	30000	0.200075
0	330000	0.200075
0	200000	0.200075
9.144	100000	0.118472
7.9248	100000	0.118472
6.7056	100000	0.118472
5.4864	100000	0.118472
0	780000	0.118472
1.2192	100000	0.118472
2.4384	100000	0.118472
3.6576	50000	0.118472
4.8768	50000	0.118472
6.096	50000	0.118472
8.72814	290000	0.118472
0.762	200000	0.101959
0	500000	0.101959
0.6096	200000	0.101959
18.8939	30000	0.101959
4.06654	40000	0.0467376
3.97411	80000	0.0467376
0.963862	120000	0.0467376
4.06654	60000	0.0467376
0.963862	70000	0.0467376
0.549486	350000	0.146105
0.762	320000	0.146105
0.6096	200000	0.146105
1.55418	500000	0.146105
1.6414	490000	0.146105
1.9812	35000	0.146105
1.524	35000	0.146105
0.9144	80000	0.146105
0	100000	0.146105
0.4572	50000	0.146105
1.3716	40000	0.146105
1.524	30000	0.146105
2.4384	100000	0.146105
3.048	200000	0.126642
2.1336	200000	0.126642
1.2192	200000	0.126642
0.3048	90000	0.126642
0	200000	0.126642
1.2192	140000	0.126642
2.1336	80000	0.126642
0.549486	200000	0.126642
0.549486	200000	0.126642
0	550000	0.110345
0.3048	330000	0.110345
0.3048	270000	0.110345
0.9144	30000	0.317509
0.3048	600000	0.317509
0.6096	330000	0.317509
0.3048	710000	0.317509
0	960000	0.317509
0.3048	670000	0.317509
0.6096	450000	0.317509
0.3048	950000	0.317509
0.6096	900000	0.317509
0.9144	600000	0.317509
1.2192	360000	0.317509
1.524	150000	0.317509
0.6096	130000	0.207898
0	270000	0.207898
0.3048	80000	0.207898
0.6096	110000	0.207898
0.3048	30000	0.207898
1.8288	620000	0.207898
1.2192	780000	0.207898
0.6096	95	0.207898
0.862105	95	0.207898
1.36311	82	0.207898
0.862105	95	0.207898
1.36311	80	0.207898
0	70000	0.198508
3.6576	120000	0.198508
1.95167	10000	0.198508
3.6576	70000	0.198508
0	120000	0.198508
5.10938	10000	0.198508
1.8288	70000	0.198508
1.8288	120000	0.198508
3.40777	10000	0.198508
1.9812	200000	0.112457
1.3716	200000	0.112457
1.0668	200000	0.112457
0.4572	300000	0.112457
0.549486	300000	0.112457
0.549486	690000	0.112457
0.1524	300000	0.112457
0.4572	300000	0.112457
1.6764	200000	0.112457
1.0668	200000	0.112457
0.762	200000	0.112457
0.1524	300000	0.112457
0.340777	300000	0.112457
0.340777	690000	0.112457
0.4572	300000	0.112457
0.762	300000	0.112457
1.8288	200000	0.112457
1.2192	200000	0.112457
0.9144	200000	0.112457
0.3048	300000	0.112457
0.431052	300000	0.112457
0.431052	690000	0.112457
0.3048	300000	0.112457
0.6096	300000	0.112457
0.431052	110000	0.0675784
2.45738	50000	0.0675784
2.76008	110000	0.0675784
0.681554	50000	0.0675784
1.25672	110000	0.0675784
0.963862	50000	0.0675784
1.524	120000	0.205452
0.6096	430000	0.205452
0.3048	960000	0.205452
1.2192	870000	0.205452
2.1336	100000	0.205452
3.048	240000	0.205452
4.8768	500000	0.205452
0.681554	180000	0.205452
0.431052	210000	0.205452
0.431052	230000	0.205452
0.681554	90000	0.205452
3.97411	20000	0.157335
1.25672	400000	0.157335
0.681554	400000	0.157335
0.3048	800000	0.157335
0.681554	400000	0.157335
3.0632	100000	0.157335
3.97411	100000	0.157335
3.3528	130000	NaN
1.8288	270000	NaN
1.2192	530000	NaN
0.3048	660000	NaN
0.6096	380000	NaN
1.2192	180000	NaN
2.7432	50000	NaN
3.6576	130000	NaN
2.1336	270000	NaN
1.524	530000	NaN
0.6096	660000	NaN
0.3048	380000	NaN
0.9144	180000	NaN
2.4384	50000	NaN
3.5052	130000	NaN
1.9812	270000	NaN
1.3716	530000	NaN
0.4572	660000	NaN
0.4572	380000	NaN
1.0668	180000	NaN
2.5908	50000	NaN
4.8768	110000	NaN
2.4384	310000	NaN
0	610000	NaN
2.4384	410000	NaN
4.8768	80000	NaN
1.2192	540000	NaN
2.4384	660000	NaN
0	60000	NaN
2.21898	30000	NaN
2.1336	100000	NaN
2.21898	30000	NaN
0.431052	50000	NaN
0.963862	10000	NaN
1.70388	20000	NaN
1.19028	70000	NaN
0.762	210000	NaN
1.19028	100000	NaN
1.9812	80000	NaN
1.83514	130000	NaN
1.55418	150000	NaN
1.22869	170000	NaN
0.963862	150000	NaN
0.3048	780000	NaN
0.963862	110000	NaN
1.55418	100000	NaN
1.3716	35000	NaN
0.762	50000	NaN
0.1524	70000	NaN
0.1524	70000	NaN
0.628361	20000	NaN
0.628361	10000	NaN
2.15526	10000	NaN
1.524	20000	NaN
0.681554	5000	NaN
0	340000	NaN
1.524	520000	NaN
3.048	360000	NaN
4.572	270000	NaN
0.3048	400000	NaN
0.9144	220000	NaN
1.524	180000	NaN
2.1336	600000	NaN
2.7432	540000	NaN
2.1336	340000	NaN
2.62199	520000	NaN
3.72056	360000	NaN
5.04534	270000	NaN
1.8288	400000	NaN
1.2192	220000	NaN
0.6096	180000	NaN
0	600000	NaN
0.6096	540000	NaN
2.7432	340000	NaN
3.13811	520000	NaN
4.10066	360000	NaN
5.33182	270000	NaN
2.4384	400000	NaN
1.8288	220000	NaN
1.2192	180000	NaN
0.6096	600000	NaN
0	540000	NaN
1.3716	340000	NaN
2.05033	520000	NaN
3.34239	360000	NaN
4.77331	270000	NaN
1.0668	400000	NaN
0.4572	220000	NaN
0.1524	180000	NaN
0.762	600000	NaN
1.3716	540000	NaN
0.3048	310000	0.14757
0	630000	0.14757
0.431052	400000	0.14757
0.681554	330000	0.14757
0.431052	30000	0.14757
0.681554	45000	0.14757

## Sheet: Figure S3
CH4 (ppmv) for Corrosion	CH4 (ppmv) for Material/weld/equip failure
390000	0
760000	0
110000	210000
20500	180000
1100	640000
25000	270000
13000	320000
9500	70000
220000	0
300	170000
5000	270000
2300	150000
190000	360000
190000	0
220000	3700
500000	3600
200000	11500
50000	9000
270000	20000
220000	43000
200000	6000
220000	14000
120000	130000
60000	180000
22500	120000
100000	560000
300000	25000
350000	770000
220000	25000
70000	6000
22500	7000
10000	25500
500000	140000
270000	170000
300	7000
170	50000
200	50000
0	50000
0	30000
0	30000
0	7000
0	10000
190000	11000
270000	10000
460000	37000
260000	12500
0	4500
0	5000
0	3000
680000	1100
750000	1000
450000	1000
0	1000
890000	40000
910000	11000
1000000	1000
870000	1000
700000	10000
620000	260000
940000	250000
990000	750000
850000	400000
890000	200000
870000	150000
830000	8500
990000	500000
0	9000
20000	28500
0	11000
0	100000
0	40000
30000	6000
250000	80000
930000	13000
450000	10500
10000	2450
0	350000
0	60000
480000	6500
4000	3200
2000	100000
1000	500
0	570
0	22000
0	25000
0	100000
0	110000
0	200000
0	24
330000	0
0	0
0	0
50000	200000
0	500000
0	200000
0	0
500	30000
40000	0
250000	0
220000	0
50000	0
250000	0
50000	0
0	0
20000	0
3000	0
0	0
200000	70000
0	0
0	0
500	120000
500	0
0	0
70000	10000
740000	0
110000	0
50000	0
0	0
10000	0
0	0
10000	0
10000	0
250000	0
650000	0
500	70000
2500	0
4000	0
0	120000
0	0
0	0
20000	10000
10000	0
20000	0
940000	0
30000	0
10000	0
10000	0
0	0
0	0
30000	0
50000	0
10000	70000
0	0
200000	0
300000	120000
170000	0
0	0
0	10000
0	0
0	0
0	0
0	0
50000	0
110000	0
370000	0
60000	120000
10000	430000
240000	960000
600000	870000
0	100000
0	240000
0	500000
0	180000
0	210000
0	230000
20000	90000
16000	40000
40000	300000
0	280000
0	40000
0	0
5000	690000
0	580000
0	170000
0	40000
0	250000
0	40000
0	220000
0	50000
0	50000
50000	100000
20000	230000
25000	220000
0	90000
0	70
0	94
13000	30
0	135
20000	0
60000	208
50000	22
140000	55
150000	45
200000	45000
150000	45000
2100	150000
0	250
200000	250
0	40000
0	50000
120000	45000
30000	45000
1000	250
0	90000
0	20000
120000	4500
50000	2250
10000	30000
0	20000
20000	40000
60000	40000
40000	240000
40000	50000
40000	10000
60000	30000
110000	20000
50000	40000
40000	20000
300000	40000
180000	10000
10000	310000
30000	630000
20000	400000
10000	330000
40000	0
50000	30000
80000	45000
30000	0
40000	0
180000	530000
20000	0
0	0
200000	0
130000	0
130000	0
20000	0
0	0
60000	60000
50000	20000
30000	20000
980000	20000
10000	20000
30000	20000
330000	0
200000	0
100000	130000
100000	100000
100000	50000
100000	50000
780000	0
100000	120000
100000	120000
50000	110000
50000	120000
50000	40000
0	150000
0	150000
0	40000
0	0
0	80000
0	50000
290000	0
0	0
0	0
0	0
200000	700000
200000	300000
200000	30000
90000	10000
200000	0
140000	0
80000	0
0	0
200000	40000
200000	80000
0	0
0	120000
130000	0
270000	0
80000	0
110000	0
0	0
30000	60000
620000	0
780000	0
95	70000
95	0
82	0
95	350000
80	320000
0	200000
0	500000
0	490000
0	35000
200000	35000
200000	80000
200000	100000
300000	50000
300000	40000
0	30000
690000	100000
0	0
300000	0
300000	0
0	550000
0	0
0	0
0	0
0	0
200000	330000
200000	270000
200000	0
300000	0
300000	0
0	30000
690000	600000
0	330000
300000	710000
300000	960000
0	670000
0	450000
0	950000
0	900000
0	600000
200000	360000
200000	150000
200000	0
300000	0
300000	0
0	110000
690000	50000
0	110000
300000	50000
300000	110000
0	50000
0	0
100000	0
150000	0
50000	0
370000	60000
370000	0
17000	0
90000	0
150000	30000
100000	100000
150000	30000
50000	0
370000	0
370000	0
17000	0
90000	0
150000	35000
100000	50000
150000	70000
50000	70000
370000	20000
370000	0
17000	10000
90000	0
150000	0
100000	0
150000	0
50000	10000
370000	20000
370000	0
17000	5000
90000	0
150000	0
20000	0
400000	340000
400000	520000
800000	360000
400000	270000
100000	400000
100000	220000
0	180000
130000	600000
270000	540000
530000	0
660000	340000
380000	520000
180000	360000
50000	270000
0	400000
0	220000
130000	180000
270000	600000
530000	540000
660000	0
380000	340000
180000	520000
50000	360000
0	270000
0	400000
130000	220000
270000	180000
530000	600000
660000	540000
380000	0
180000	340000
50000	520000
0	360000
0	270000
0	400000
110000	220000
310000	180000
610000	600000
410000	540000
80000	0
0	0
0	0
0	50000
540000	10000
660000	0
0	0
20000	0
70000	NaN
210000	NaN
100000	NaN
80000	NaN
0	NaN
0	NaN
0	NaN
0	NaN
130000	NaN
150000	NaN
170000	NaN
150000	NaN
780000	NaN
110000	NaN
100000	NaN
0	NaN
